# Supplementary material for: Long-Term Left Ventricular Remodelling in Rat Model of Nonreperfused Myocardial Infarction: Sequential MR Imaging Using a 3T Clinical Scanner
Source: Hindawi journal article supplement (doi:10.1155/2012/504037), 2012-01-01
Supplement: f1 [file 504037.f1.zip]

Archive with 4 entries (4 files):
- 504037/4_weeks_infarcted_rat_4_chamber.avi
- 504037/4_weeks_infarcted_rat_shortaxis.avi
- 504037/4_weeks_sham_rat_4_chamber.avi
- 504037/4_weeks_sham_rat_shortaxis.avi
